# Supplementary material for: A Drug Screening Pipeline Using 2D and 3D Patient-Derived In Vitro Models for Pre-Clinical Analysis of Therapy Response in Glioblastoma
Source: MDPI journal article supplement (doi:10.3390/ijms22094322), 2021-04-21
Supplement: s1 [file s1]

# Supplementary Figure 2

1

## Dispensing of StemPro NSC Medium

Reservoir - contains Medium

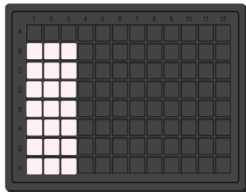

Transfers calculated amount of medium for each concentration (except Row A)

Initial 96 Well-Plate

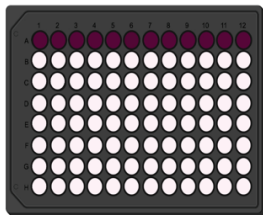

End Result of Step 1 :

Row A = initial drug concentrations of each drug (manually) per wells  
Rows B to H = required volumes of various drug concentration dilution

2

## Serial Dilution

Final 96 Well-Plate

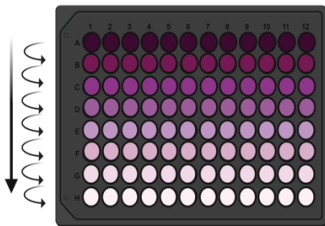

Performs serial dilution in vertical direction starting from Row A to H and mixes contents 3 times in between dilutions.

End Result of Step 2:

Rows A to H - various concentrations of drugs  
Columns 1 to 12 = different drugs

- - StemPro NSC Medium
- - Initial concentration (500µm) of each drugs prepared manually in Row A wells of 96-well-plate
- - Drug concentration of 100µm
- - Drug concentration of 50µm
- - Drug concentration of 10µm
- - Drug concentration of 1µm
- - Drug concentration of 0.5µm
- - Drug concentration of 0.1µm

3

## Transfer of drugs to tumour cells

Final 96 Well-Plate

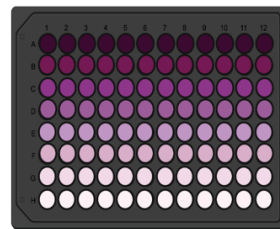

Transfers four replicates for each drug concentration

384 Well-Plate - contains tumour cells

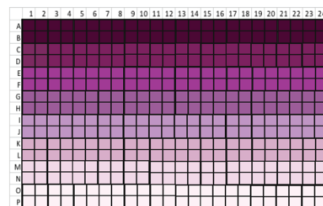

End Result of the whole protocol:

Various concentrations of each drugs transferred to tumour cells quadruplicate times.
