# Supplementary figures and images for: A Drug Screening Pipeline Using 2D and 3D Patient-Derived In Vitro Models for Pre-Clinical Analysis of Therapy Response in Glioblastoma
Source: MDPI journal article supplement (doi:10.3390/ijms22094322), 2021-04-21

# Supplementary Figure 1

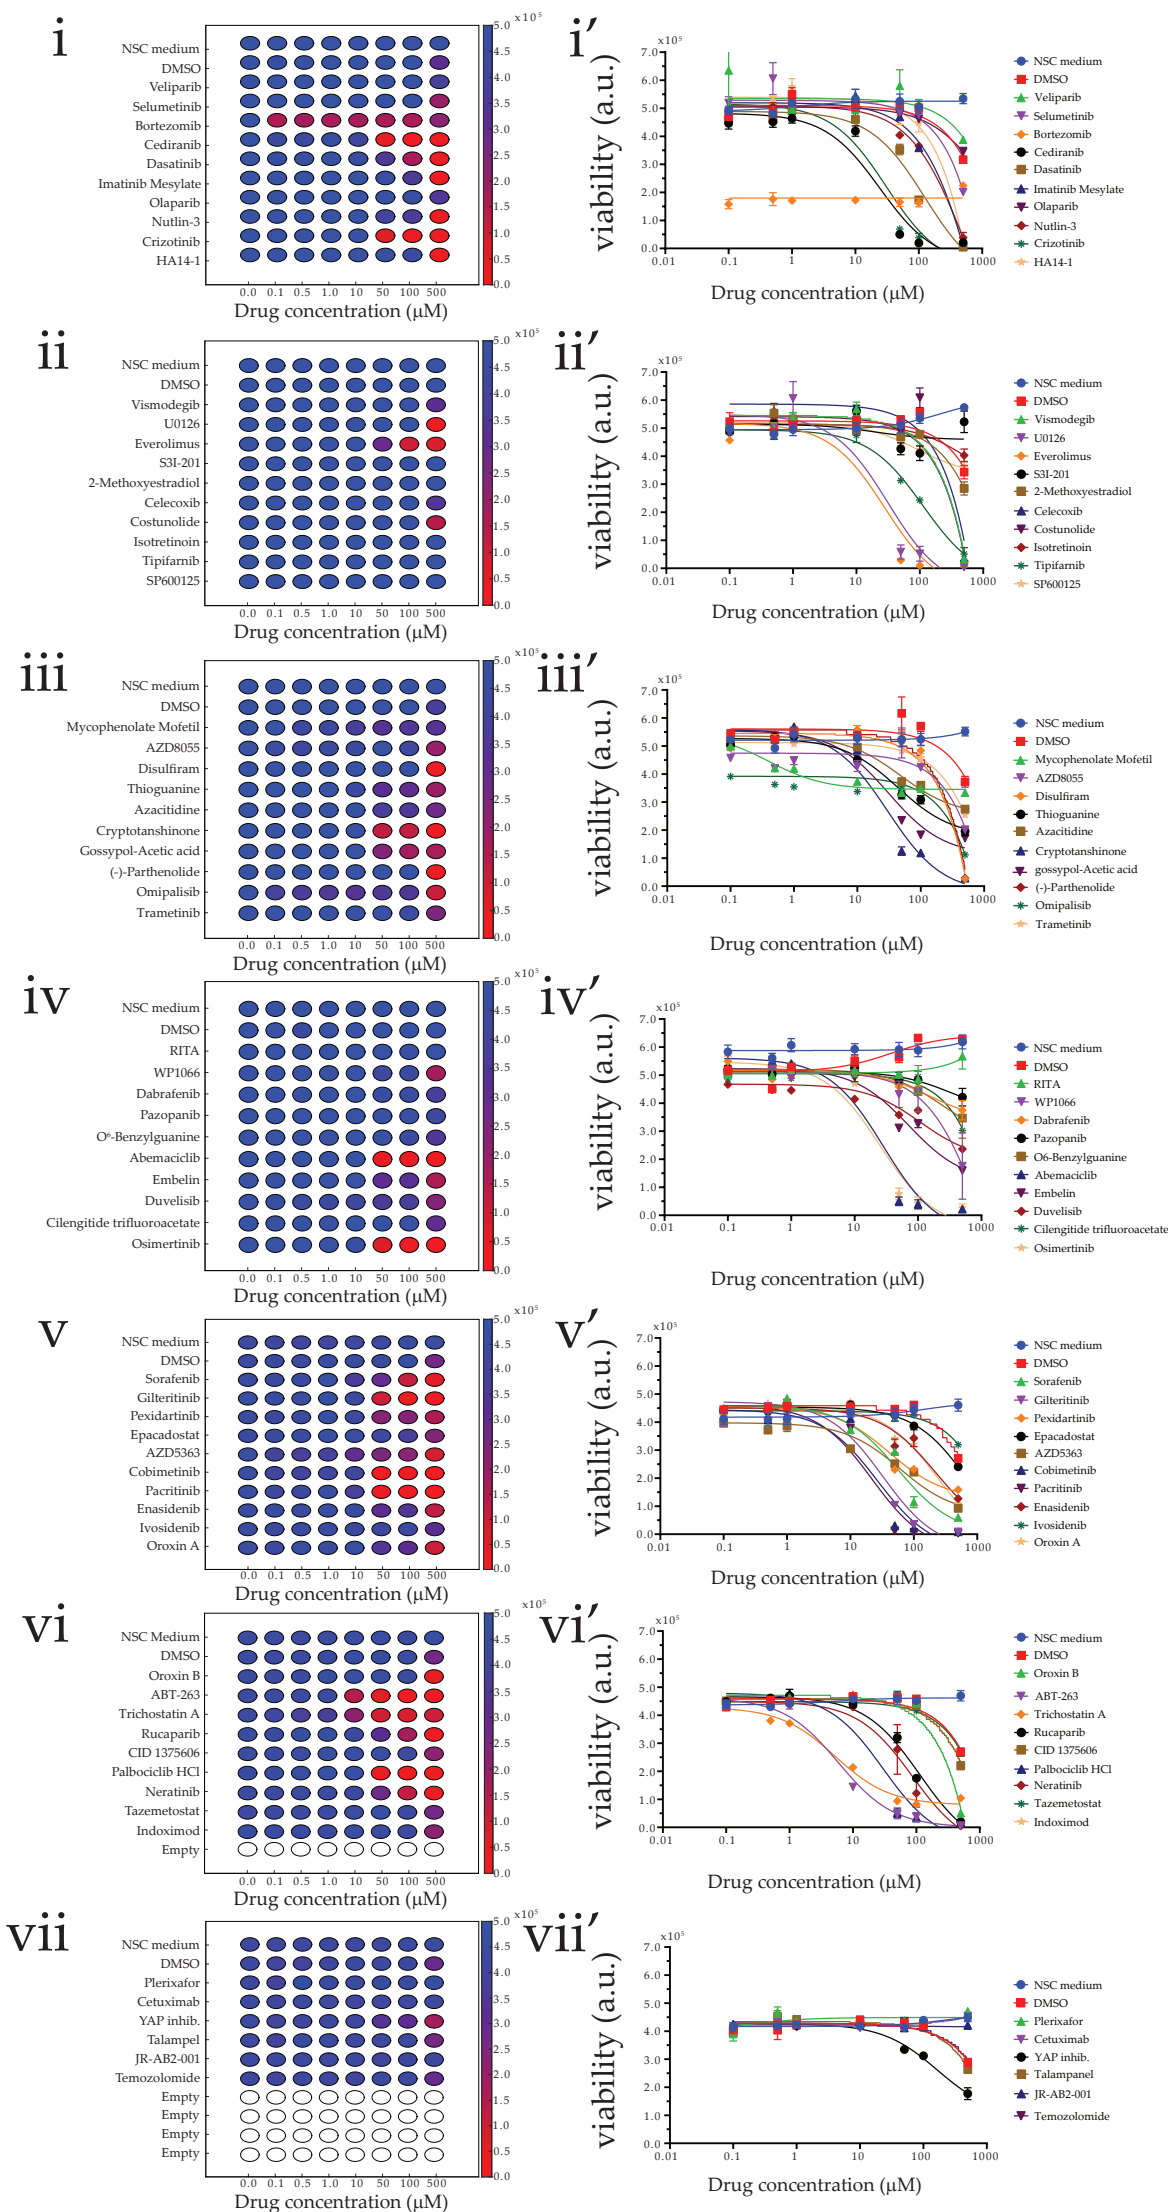

Supplement: s1 [file s1]
